# Supplementary material for: Computational studies on structural and electronic properties of functionalized MXene monolayers and nanotubes
Source: Royal Society of Chemistry journal article supplement (doi:10.1039/c4ta06557c), 2015-01-01
Supplement: c4ta06557c1.pdf [file c4ta06557c1.pdf]

Electronic supplementary information

## Computational Studies on Structural and Electronic Properties of Functionalized MXene Monolayers and Nanotubes

Xu Zhang, Zhinan Ma, Xudong Zhao, Qing Tang, Zhen Zhou\*

Tianjin Key Laboratory of Metal and Molecule Based Material Chemistry, Key Laboratory of Advanced Energy Materials Chemistry (Ministry of Education), Computational Centre for Molecular Science, Institute of New Energy Material Chemistry, Collaborative Innovation Center of Chemical Science and Engineering (Tianjin), Nankai University, Tianjin 300071, P. R. China

\*Corresponding Author, Email: zhouzhen@nankai.edu.cn (ZZ).

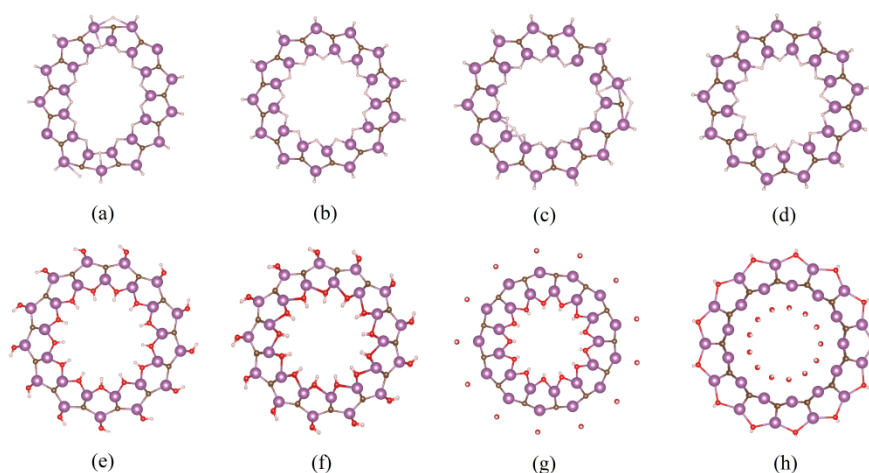

**Figure S1.** Atomic structures of (13,0) zigzag  $\text{Sc}_2\text{CH}_2$  and  $\text{Sc}_2\text{C}(\text{OH})_2$  nanotubes rolled from A/ $\text{Sc}_2\text{C}$ /A, B/ $\text{Sc}_2\text{C}$ /B, and A/ $\text{Sc}_2\text{C}$ /B layers, respectively.

**Table S1.** Relative total energies  $\Delta E$  (kal/mol/formula) for the most stable zigzag nanotubes and armchair nanotubes for  $\text{Sc}_2\text{CH}_2$  and  $\text{Sc}_2\text{C}(\text{OH})_2$ , respectively.

| $\Delta E$ (kal/mol/formula) |        |
|------------------------------|--------|
| $(10,10)^{\text{H}}$         | 0      |
| $(9,9)^{\text{H}}$           | 0.659  |
| $(8,8)^{\text{H}}$           | 2.084  |
| $(13,0)^{\text{H}}$          | 7.867  |
| $(10,10)^{\text{OH}}$        | 0      |
| $(9,9)^{\text{OH}}$          | 1.724  |
| $(8,8)^{\text{OH}}$          | 4.495  |
| $(13,0)^{\text{OH}}$         | 15.469 |

**Table S2.** Lattice parameters  $a$  (Å), length of Sc-X bond ( $X = \text{H}$  for  $\text{Sc}_2\text{CH}_2$  or  $\text{O}$  for  $\text{Sc}_2\text{C}(\text{OH})_2$  and  $\text{Sc}_2\text{CO}_2$ ) (Å), length of Sc-C bond (Å) from DFT, as well as the absolute value of fractional error between DFTB and DFT  $E_a$ ,  $E_X$  and  $E_C$ .

| System                                      | $a$ (Å) | $E_a$ | Sc-X (Å)    | $E_X$     | Sc-C (Å)    | $E_C$     |
|---------------------------------------------|---------|-------|-------------|-----------|-------------|-----------|
| $\text{Sc}_2\text{C}$                       | 3.225   | 4.4%  | /           | /         | 2.221       | 1.7%      |
| A/ $\text{Sc}_2\text{C}$ /A <sup>(H)</sup>  | 3.233   | 1.1%  | 2.124       | 0.5%      | 2.241       | 0.8%      |
| A/ $\text{Sc}_2\text{C}$ /A <sup>(OH)</sup> | 3.227   | 0.7%  | 2.216       | 2.2%      | 2.244       | 0.4%      |
| A/ $\text{Sc}_2\text{C}$ /B <sup>(O)</sup>  | 3.431   | 2.8%  | 2.081/2.098 | 0.2%/0.2% | 2.530/2.201 | 4.4%/1.2% |

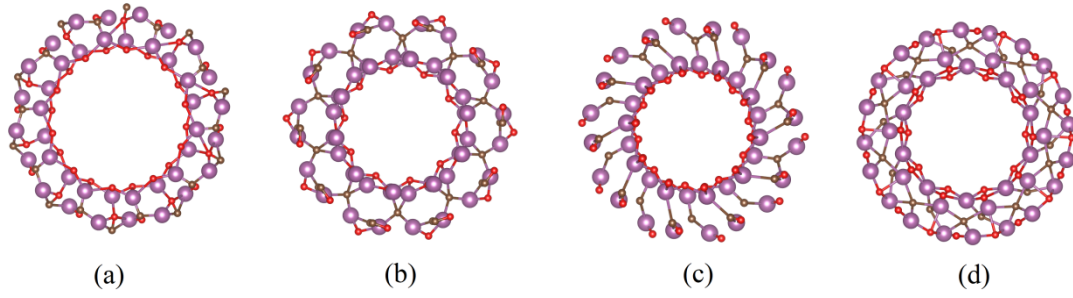

**Figure S2.** Atomic structures of (10,10) armchair  $\text{Sc}_2\text{CO}_2$  nanotubes rolled from A/ $\text{Sc}_2\text{C}$ /A, B/ $\text{Sc}_2\text{C}$ /B, and A/ $\text{Sc}_2\text{C}$ /B layers, respectively.

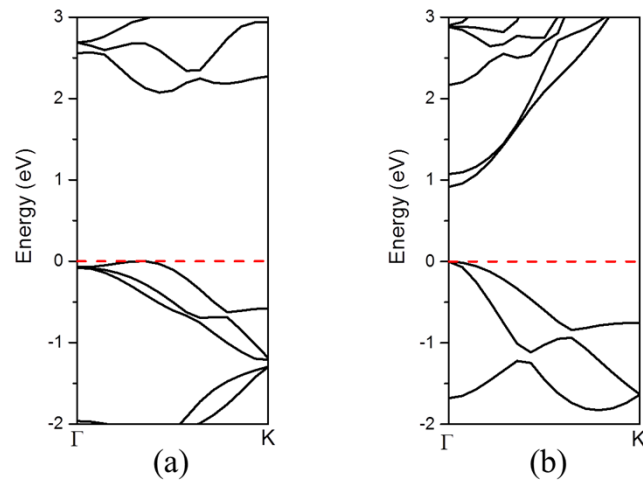

**Figure S3.** Band structures near Fermi level for the corresponding  $\text{Sc}_2\text{CH}_2$  (a) and  $\text{Sc}_2\text{C}(\text{OH})_2$  (b) monolayers along direction b, respectively.
